# Supplementary material
Source: PubMed Central journal article supplement (PMC2872679)
Supplement: cgr0127-0112-s01.pdf [file cgr0127-0112-s01.pdf]

**Supplementary Table S1.** Fossil constraints utilized in this study. All priors were implemented. The Amphisbaenian calibration point is somewhat controversial, but it does not have any appreciable effect on our estimates of divergence times.

| Fossil Calibration    | Node | Age (Mya) | Lognormal mean | Reference           |
|-----------------------|------|-----------|----------------|---------------------|
| Oldest Amphisbaenian  | 1    | >100      | 4.61           | Gao, 1997           |
| Oldest Scincomorpha   | 2    | >160      | 5.08           | Evans, 2003         |
| Oldest Anguimorpha    | 3    | >166      | 5.11           | Evans, 2003         |
| Oldest Helodermatidae | 4    | >100      | 4.61           | Nydam, 2000         |
| Oldest Caenophidian   | 5    | >94       | 4.55           | Rage & Werner, 1999 |

### **References**

- Evans SE: At the feet of the dinosaurs: the early history and radiation of lizards. *Biol Rev* 78:513–551 (2003).
- Gao K: *Sineoamphisbaena* phylogenetic relationships discussed: reply. *Can J Earth Sci* 34:886–889 (1997).
- Nydam RL: A new taxon of helodermatid-like lizard from the Albian-Cenomanian of Utah. *J Vertebr Paleontol* 20:285–294 (2000).
- Rage J-C, Werner C: Mid-Cretaceous (Cenomanian) snakes from Wadi Abu Hashim, Sudan: the earliest snake assemblage. *Palaeontologia Africana* 35:85–110 (1999).
